# Supplementary material
Source: Elsevier journal article supplement (https://www.sciencedirect.com/science/article/pii/S0211139X22000993)
Supplement: mmc1 [file S0211139X22000993:mmc1.doc]

**Tabla S1. Modelo de regresión logística binaria.**

|  | **B** | **Error estándar** | **Wald** | **p-valor** | **exp(B) [IC 95%]** | **Chi-cuadrado** | **R2 Nagelkerke** |
| --- | --- | --- | --- | --- | --- | --- | --- |
| **Modelo 1** |  |  |  |  |  | 25.646 | 0.062 |
| Síntomas depresivos | 0.970 | 0.192 | 25.6 | <0.001 | **2.638 [1.812-3.840]** |
| **Modelo 2** |  |  |  |  |  | 33.385 | 0.081 |
| Síntomas depresivos | 1.006 | 0.194 | 26.9 | <0.001 | **2.734 [1.869-3.998]** |
| Género Femenino | -0.557 | 0.200 | 7.8 | 0.005 | **0.573 [0.387-0.847]** |
| **Modelo 3** |  |  |  |  |  | 38.069 | 0.065 |
| Síntomas depresivos | 0.959 | 0.196 | 24.1 | <0.001 | **2.610 [1.779-3.830]** |
| Género Femenino | -0.580 | 0.201 | 8.3 | 0.004 | **0.560 [0.378-8.30]** |
| Aislamiento social | 0.431 | 0.198 | 4.7 | 0.030 | **1.539 [1.043-2.268]** |

Método avanzar por pasos (condicional). Variables eliminadas de la ecuación: edad, soledad, nivel educacional.

**Calculo potencia post hoc (1-β err prob).**

Programa G*Power 3.1, versión 3.1.9.2 (Universität Düsseldorf, Germany).

*Prueba > proporciones > dos grupos independientes: desigualdad, prueba z > análisis post hoc*

- Prueba de dos colas
- valor α = 0,05
- N = 582

**Resultados**

| **Variable** | **1-β err prob** |
| --- | --- |
| Soledad | 0.92 |
| Aislamiento social | 0.77 |
| Síntomas depresivos | 0.99 |
| Género | 0.79 |
